1 **Combinatorial Genetic Control of Rpd3S through histone H3K4 and H3K36 Methylation**  
2 **in Budding Yeast**

3

4 Kwan Yin Lee\*, Mathieu Ranger\*, and Marc D. Meneghini\*

5 \*Department of Molecular Genetics, University of Toronto, ON, M5S 1A8, Canada

6 Running title: Rpd3S control by H3K4me and H3K36me

7 Keywords: Rpd3S; histone methylation; *SET1*; *JHD2*; *RPH1*; *SET2*

8 Corresponding author mailing addresses:

9 Marc Meneghini

10 Dept. of Molecular Genetics University of Toronto

11 MaRS2 1532

12 661 University Avenue

13 Toronto, ON M5G 1M1

14 Office: 416-978-7578

15 Fax: 416-978-6885

16 email: marc.meneghini@utoronto.ca

17

18

19

## 1 Abstract

2 Much of euchromatin regulation occurs through reversible methylation of histone H3  
3 lysine-4 and lysine-36 (H3K4me and H3K36me). Using the budding yeast *Saccharomyces*  
4 *cerevisiae*, we previously found that levels of H3K4me modulated temperature sensitive alleles  
5 of the transcriptional elongation complex Spt6-Spn1 through an unknown H3K4me effector  
6 pathway. Here we identify the Rpd3S histone deacetylase complex as the H3K4me effector  
7 underlying these Spt6-Spn1 genetic interactions. Exploiting these Spt6-Spn1 genetic interactions,  
8 we show that H3K4me and H3K36me collaboratively impact Rpd3S function in an opposing  
9 manner. H3K36me is deposited by the histone methyltransferase Set2 and is known to promote  
10 Rpd3S function at RNA PolIII transcribed open reading frames. Using genetic epistasis  
11 experiments, we find that mutations perturbing the Set2-H3K36me-Rpd3S pathway suppress the  
12 growth defects caused by temperature sensitive alleles of *SPT6* and *SPN1*, illuminating that this  
13 pathway antagonizes Spt6-Spn1. Using these sensitive genetic assays, we also identify a role for  
14 H3K4me in antagonizing Rpd3S that functions through the Rpd3S subunit Rco1, which is known  
15 to bind H3 N-terminal tails in a manner that is prevented by H3K4me. Further genetic  
16 experiments reveal that the H3K4 and H3K36 demethylases *JHD2* and *RPH1* mediate this  
17 combinatorial control of Rpd3S. Finally, our studies also show that the Rpd3L complex, which  
18 acts at promoter-proximal regions of PolIII transcribed genes, counters Rpd3S for genetic  
19 modulation of Spt6-Spn1, and that these two Rpd3 complexes balance the activities of each  
20 other. Our findings present the first evidence that H3K4me and H3K36me act combinatorially to  
21 control Rpd3S.

22

## 1 **Introduction**

2           Unstructured N-terminal tails of histone proteins emanate from the nucleosome core and  
3 are sites of a diverse array of post-translational modifications (STRAHL AND ALLIS 2000).  
4 Methylations of histone H3 on lysine-4 and lysine-36 (H3K4me and H3K36me) are among the  
5 most well studied histone post-translational modifications. Like all lysine methylations, H3K4  
6 and H3K36 can be mono, di, or tri methylated (me1, me2, me3), and these forms have distinctive  
7 roles in regulation of proteins with domains that distinguish these states (YUN *et al.* 2011;  
8 MUSSELMAN *et al.* 2012; RANDO 2012). Together with a plethora of other histone post-  
9 translational modifications, H3K4me and H3K36me contribute to a diverse chromatin landscape.  
10 A prediction of the histone code hypothesis states that chromatin effector complexes interpret  
11 this diverse landscape through their ability to distinguish multiple histone modifications  
12 combinatorially (STRAHL AND ALLIS 2000). Indeed, chromatin effector complexes often contain  
13 multiple subunits with protein domains known to distinguish histone modification states (DOYON  
14 AND COTE 2004; LI *et al.* 2007; WANG *et al.* 2011). However, although this prediction has been  
15 satisfied with clear biochemical support (LI *et al.* 2007; MCDANIEL *et al.* 2016), there exists little  
16 genetic evidence specifically addressing this component of the histone code hypothesis.

17           Rpd3 is the catalytic subunit of the conserved histone deacetylase complexes Rpd3L and  
18 Rpd3S in the yeast *S. cerevisiae* (RUNDLETT *et al.* 1996; BERNSTEIN *et al.* 2000; KURDISTANI *et*  
19 *al.* 2002). Distinctive functions of Rpd3S and Rpd3L are enabled by their chromatin recruitment  
20 to discrete regions of RNA PolII transcribed genes, with Rpd3L being recruited to 5' promoter-  
21 proximal regions (CARROZZA *et al.* 2005a) while Rpd3S is principally found downstream within  
22 the gene bodies (CARROZZA *et al.* 2005b; KEOGH *et al.* 2005). Both Rpd3S and Rpd3L share the  
23 three core subunits Rpd3, Sin3, and Ume1 and their differing localizations on chromatin are

1 likely facilitated through additional protein subunits that distinguish these complexes. Rpd3L  
2 contains numerous additional protein subunits (CARROZZA *et al.* 2005a), and controls meiotic  
3 progression in diploid cells as well as the transcriptional program of haploid cells entering  
4 quiescence (LARDENOIS *et al.* 2015; MCKNIGHT *et al.* 2015). The Rco1 and Eaf3 proteins are  
5 specific for Rpd3S, which negatively regulates transcriptional elongation by RNA PolII in  
6 mitotically proliferating cells and prevents spurious intergenic transcription (CARROZZA *et al.*  
7 2005b; JOSHI AND STRUHL 2005; KEOGH *et al.* 2005; QUAN AND HARTZOG 2010). Eaf3 possesses  
8 a biochemically confirmed capacity for binding to H3K36me (LI *et al.* 2007; XU *et al.* 2008;  
9 RUAN *et al.* 2015; STEUNOU *et al.* 2016) and accordingly mediates Rpd3S activity at RNA PolII  
10 transcribed open reading frames where H3K36me is found (CARROZZA *et al.* 2005b; KEOGH *et*  
11 *al.* 2005). The function of Rpd3S also requires the Rco1 subunit, which binds the H3 N-terminal  
12 tail through its tandem PHD domains (LEE *et al.* 2013; RUAN *et al.* 2015; MCDANIEL *et al.*  
13 2016). Interestingly, methylation of H3K4 prevents Rco1 binding to the H3 N-terminus *in vitro*  
14 (MCDANIEL *et al.* 2016), though the *in vivo* roles of H3K4me for Rpd3S function remain  
15 unknown.

16 We previously showed that the Spt6-Spn1 histone chaperone complex was genetically  
17 governed in an H3K4me3-dependent manner through the opposing roles of the H3K4  
18 methyltransferase and demethylase enzymes Set1 and Jhd2 (LEE *et al.* 2018). Mutations in *SET1*  
19 and other genes that cause reduced H3K4me3 enhance the growth defects caused by temperature  
20 sensitive alleles of *SPN1* and *SPT6*, while mutation of *JHD2*, which causes increased H3K4me3,  
21 suppress Spt6-Spn1. These and other results supported our conclusion that H3K4me3 levels  
22 impacted Spt6-Spn1, though the pathways underlying Spt6-Spn1 regulation by H3K4me  
23 remained opaque (LEE *et al.* 2018).

1           Here we identify Rpd3S as the H3K4me effector pathway impacting Spt6-Spn1 and  
2 provide genetic evidence for the biochemically predicted, though untested, model that H3K4me  
3 collaborates with H3K36me to combinatorially control the function of Rpd3S through its Eaf3  
4 and Rco1 subunits. We find that mutating components throughout the Set2-H3K36me-Rpd3S  
5 pathway suppress Spt6-Spn1 mutations, suggesting that activation of Rpd3S through H3K36me  
6 opposes Spt6-Spn1. Using sensitive epistasis experiments, we show that in opposition to this  
7 known H3K36me Rpd3S activating role, H3K4me negatively impacts Rpd3S. Further genetic  
8 experiments suggest that H3K4me opposes Rpd3S by inhibiting Rco1 binding to H3 N-terminal  
9 tails. Our genetic findings are in good agreement with the biochemically characterized  
10 specificities of the chromatin binding domains within Rco1 and Eaf3, and suggest that these  
11 binding specificities fine-tune the action of Rpd3S on chromatin.

12

## 13 **Materials and Methods**

### 14 **Yeast Strains**

15 Standard yeast genetic methods were used for construction of all strains and deletion mutants  
16 were obtained from the gene deletion collection (GIAEVER *et al.* 2002). The GAL inducible  
17 *JHD2* alleles were constructed using PCR based integration as described (LONGTINE *et al.* 1998).  
18 The *JHD2(H427A)* mutation was constructed using the delitto perfetto method (STORICI AND  
19 RESNICK 2003). Yeast strains used in this study are listed in Table S1. All strains were  
20 constructed through genetic crosses followed by dissections in the BY4742 background.

### 21 **Serial dilution assays**

1 Yeast strains were inoculated into several mL of YPD (1% yeast extract, 2% peptone, and 2%  
2 glucose) and grown overnight at room temperature (23°C). Each strain was diluted to an OD600  
3 = 0.4, then 10-fold serially diluted five times and spotted on synthetic complete (SC) media  
4 (YNB media (Multicell Wisent) containing 5 g/L of ammonium sulfate and either 2% glucose or  
5 2% galactose as described previously (LEE *et al.* 2018).

## 6 **Western blots**

7 Cells were grown to mid-logarithmic phase in synthetic complete (SC) medium + 2% raffinose  
8 and transferred to SC + 2% galactose medium. Aliquots of these cultures were taken 1 hour after  
9 transfer to galactose-containing media. Proteins were then extracted and processed for western  
10 blotting as described previously (XU *et al.* 2012). Equal amounts of protein were electrophoresed  
11 on SDS-PAGE gels and transferred onto PVDF membranes. Immunoblot analysis was performed  
12 as described (SOLOVEYCHIK *et al.* 2016). Visualization of the proteins was performed by  
13 exposing the membrane to light sensitive film. The PVDF membrane was stripped and re-probed  
14 with different antibodies. Stripping the PVDF membrane was accomplished by incubating the  
15 membrane for 30 minutes at 50° C with a mixture consisting of 100 mM 2-β-mercaptoethanol,  
16 2% SDS and 62.5 mM Tris- HCl pH 6.7.

## 17 **Antibodies**

18 The following antibodies were used in this study and purchased from Abcam: Anti-Histone H3  
19 antibody (ab1791), Anti-Histone H3K4me3 antibody (ab8580), and Anti-Histone H3K4me1  
20 antibody (ab8895). The following antibody was used in this study and purchased from Millipore:  
21 Anti-Histone H3K4me2 (07-030).

22

## 1 Results

### 2 Opposing roles of H3K4me and H3K36me in control of Spt6-Spn1

3 We previously found that deletion of *JHD2* (*jhd2Δ*) suppressed TS alleles of *SPT6* and  
4 *SPN1* and this was attributable to increased H3K4me levels caused by *jhd2Δ* (LEE et al. 2018).  
5 Because *set2Δ* was previously found to suppress TS alleles in the functionally related FACT  
6 complex (BISWAS *et al.* 2006), we asked if *set2Δ* similarly suppressed Spt6-Spn1 TS mutations.  
7 We found that *set2Δ* strongly suppressed the temperature sensitive growth defects caused by the  
8 *spt6-14* and *spn1-K192N* mutations (Figure 1A and 1B). The magnitude of suppression caused  
9 by *set2Δ* was greater than that caused by *jhd2Δ* and no additive effects on suppression were  
10 observed (Figure 1A and 1B). All strains described here were engineered using genetic crosses  
11 and tetrad dissection. For all results shown, we isolated at least 2 independently constructed  
12 strain replicates through tetrad dissection. Though replicates and WT control strains are not  
13 always shown in the interest of space, all results we report here are upheld in these replicates.  
14 Strain fitness was assessed using spot assays to compare growth rates at varied temperatures.  
15 Though also not shown in the interest of space, we always observed complete loss of growth of  
16 our TS strains at 38.5°C, confirming that the TS alleles were intact and no bypass suppression  
17 occurred.

18 As the only known substrate of Set2 is H3K36, we hypothesized that the loss of  
19 H3K36me caused by *set2Δ* accounted for the suppression of Spt6-Spn1 TS alleles. To test this,  
20 we engineered strains combining *spn1-K192N* with synthetic histone H3 alleles encoding histone  
21 H3 lysine 36 substituted with arginine (H3K36R) (DAI *et al.* 2008). The H3K36R substitution  
22 suppressed *spn1-K192N* temperature sensitivity compared with an isogenic strain expressing a

1 wild type synthetic histone allele (Figure 1C). The magnitude of suppression by H3K36R  
2 substitution was equivalent to that of *set2Δ* and their combined influence was not additive  
3 (Figure 1C). This result supports the conclusion that suppression of *spn1-K192N* by *set2Δ*  
4 occurred through loss of H3K36me, showing that H3K36me somehow opposed Spn1 function.

5 To genetically deconvolute the impact of H3K4me and H3K36me on Spt6-Spn1, we  
6 engineered strains expressing the endogenous *JHD2* gene under control of the *GAL1-10*  
7 promoter (*P<sub>GAL</sub>-JHD2*), which leads to *JHD2* overexpression in galactose medium. We found  
8 that growth of strains harboring *P<sub>GAL</sub>-JHD2* in galactose containing media caused dramatic  
9 depletions of H3K4me<sub>3</sub> and H3K4me<sub>2</sub> (Figure 2A). As expected based on our previous findings,  
10 on media containing glucose, which leads to strong transcriptional repression of *GAL1-10*, *P<sub>GAL</sub>-*  
11 *JHD2* phenocopied *jhd2Δ* and caused suppression of both *spt6-14* and *spn1-K192N* (Figure 2B  
12 and data not shown). On media containing galactose however, we found that overexpression of  
13 *JHD2* negatively affected the growth of *spt6-14* and *spn1-K192N* (Figure 2C and 2D), consistent  
14 with our previous finding that mutations reducing H3K4me<sub>3</sub> enhanced these Spt6-Spn1 alleles  
15 (LEE *et al.* 2018). Indeed, the enhancement of Spt6-Spn1 TS mutations caused by *P<sub>GAL</sub>-JHD2* in  
16 the presence of galactose was reverted by mutation of Jhd2 histidine-427 to alanine (H427A),  
17 which renders Jhd2 catalytically inactive and unable to demethylate H3K4 (INGVARSDOTTIR *et*  
18 *al.* 2007; LIANG *et al.* 2007) (Figure 2A and S1). Using the *P<sub>GAL</sub>-JHD2* allele, we found that  
19 suppression of both *spt6-14* and *spn1-K192N* by *set2Δ* was epistatic to the growth defect caused  
20 by *JHD2* overexpression (Figure 2C and Figure 2D). To confirm that this epistatic relationship  
21 related specifically to H3K4 demethylation by Jhd2, we determined that *set2Δ* similarly  
22 suppressed the phenotypic enhancement of *spn1-K192N* caused by *set1Δ* (Figure 2E).



1           Collectively, these results demonstrate that Spt6-Spn1 activity was opposed both by  
2 methylation of H3K36 and by hypo-methylation of H3K4 (denoted hereafter as “H3K4me0”).  
3 Moreover, the epistatic relationships we show suggest that the methylation state of H3K36 had a  
4 more crucial role than that of H3K4 in Spt6-Spn1 regulation. The remainder of the work  
5 described here exploits the Spt6-Spn1 TS mutations as a tool enabling genetic interrogation of  
6 this prospective H3K4me0/H3K36me regulatory pathway. Because *spn1-K192N* generally  
7 provided more robust genetic interactions compared with *spt6-14*, most of our studies used the  
8 *spn1-K192N* mutation and we show these here, though we always observed qualitatively  
9 equivalent interactions using *spt6-14*.

## 10 **H3K4 and H3K36 methylation states collaboratively modulated Rpd3S**

11           A parsimonious model explaining our results posits an effector complex that opposes  
12 Spt6-Spn1 which itself is combinatorially controlled by H3K4/36me states. The Rpd3S histone  
13 deacetylase complex possesses two requisite characteristics that satisfy this hypothesis: 1, Rpd3S  
14 is positively regulated through an interaction of its Eaf3 subunit with H3K36me (LI *et al.* 2007;  
15 XU *et al.* 2008; RUAN *et al.* 2015); and 2, The Rco1 subunit of Rpd3S binds to H3 N-terminal  
16 tails, and methylation of H3K4 opposes Rco1 binding (LEE *et al.* 2007; RUAN *et al.* 2015;  
17 MCDANIEL *et al.* 2016). We determined that the temperature sensitive growth defects caused by  
18 *spn1-K192N* were suppressed by *rpd3Δ* and that suppression by *rpd3Δ* and *jhd2Δ* were not  
19 additive, similarly to what we found with *jhd2Δ* and *set2Δ* (Figure 3A). Supporting the model  
20 that a loss of Rpd3S function specifically accounted for this result, we found that *rco1Δ* and  
21 *eaf3Δ* equivalently suppressed *spn1-K192N* (Fig 3B and data not shown). Eaf3 is also found in  
22 the NuA4 histone acetyltransferase complex. To rule out a role for Eaf3 as a component of NuA4  
23 in our findings, we interrogated genetic interactions of *eaf7Δ*, which causes a specific loss of

1 Eaf3 from NuA4 while leaving Eaf3 incorporation into Rpd3S unperturbed (ROSSETTO *et al.*  
2 2014). Deletion of *EAF7* caused no detectable genetic interactions with *spn1-K192N*, further  
3 upholding the conclusion that perturbation of Rpd3S specifically accounted for our findings  
4 (Figure S2).

5         The activation of Rpd3S by H3K36me is well established. We propose that H3K4me0  
6 acts collaboratively with H3K36me, though in a comparatively minor fashion, to promote Rpd3S  
7 function (Figure 3C). To test this, we again employed *P<sub>GAL</sub>-JHD2* strains. Like *set2Δ*,  
8 suppression of *spn1-K192N* by both *eaf3Δ* and *rco1Δ* was epistatic to the enhanced growth  
9 defect caused by *JHD2* galactose overexpression (Figure 3D and 3E). As mutations in *RCO1* and  
10 *EAF3* disrupt Rpd3S while leaving the Rpd3L complex intact (CARROZZA *et al.* 2005b), these  
11 findings are consistent with Rpd3S mediating the proposed H3K4me0/H3K36me effector  
12 pathway (Figure 3C).

13         In contrast to the well-characterized mechanistic role of H3K36me in activation of Rpd3S  
14 through Eaf3, the potential role of H3K4me in modulation of Rpd3S through Rco1 is  
15 unexplored. Rco1 binds to H3 N-terminal tails that are hypo-methylated on H3K4 through its  
16 tandem PHD domains, each of which is essential for interaction with the H3 N-terminus  
17 (MCDANIEL *et al.* 2016). To specifically evaluate the genetic consequences of loss of H3K4  
18 binding by Rco1, we made use of an allele of Rco1 that lacks one of these PHD domains (*rco1-*  
19 *PHDΔ*) but encodes a stable protein that is assembled into Rpd3S *in vivo* (LI *et al.* 2007). We  
20 found that *rco1-PHDΔ* suppressed *spn1-K192N* equivalently to *jhd2Δ*, and that these phenotypes  
21 were not additive (Figure 4A). These results support our model that Jhd2 opposed Rpd3S  
22 function by increasing the methylation state of H3K4, thereby restricting the ability of Rco1 to  
23 activate Rpd3S through its H3 N-terminal tail binding activity (Figure 3C). A further prediction

1 of this model is that *rcol1Δ* should also suppress the enhanced *spn1-K192N* growth defects  
2 caused by the complete loss of H3K4me (LEE *et al.* 2018). We tested this using the H3K4R allele  
3 and found this was indeed the case: *rcol1Δ* suppressed the growth defects of *spn1-K192N H3K4R*  
4 mutants (Figure 4B).

5 Like H3K4me, H3K36me is also subject to the opposing roles of methyltransferases and  
6 demethylases. Our model predicts that increased H3K36me levels caused by loss of H3K36  
7 demethylation should show the opposite phenotype as *set2Δ* and enhance the temperature  
8 sensitive growth defect of *spn1-K192N*. Yeast possess two confirmed H3K36 demethylases  
9 belonging to the Jumonji superfamily, Jhd1 and Rph1. Rph1 demethylates both H3 K36 tri- and  
10 dimethyl substrates (KIM AND BURATOWSKI 2007; KLOSE *et al.* 2007) while Jhd1 targets di- and  
11 monomethyl H3K36 (TSUKADA *et al.* 2006; FANG *et al.* 2007). We found no consequence for  
12 *jhd1Δ* in any of our experiments (data not shown). In contrast to *jhd1Δ*, we found that *rph1Δ*  
13 strongly exacerbated the *spn1-K192N* growth defects, and that this consequence was reverted by  
14 *set2Δ*, suggesting that Rph1-mediated H3K36 demethylation opposed Rpd3S function (Figure  
15 3C and 4C). Indeed, *spn1-K192N* enhancement by *rph1Δ* was also reverted by *rcol1Δ* (Figure  
16 S3). Taking into consideration the biochemical activities of Jhd1 and Rph1, our findings suggest  
17 that it is the tri-methylated state of H3K36 (H3K36me<sub>3</sub>) that specifically activates Rpd3S,  
18 consistent with biochemical characterization of Eaf3 binding specificity (STEUNOU *et al.* 2016).  
19 Finally, we found that *spn1-K192N* enhancement by *rph1Δ* was partially suppressed by *jhd2Δ*  
20 (Figure 4D). The partial suppression of *spn1-K192N rph1Δ* by *jhd2Δ* is consistent with the more  
21 predominant role we propose for H3K36me in Rpd3S activation compared with H3K4me<sub>0</sub>  
22 (Figure 3C).

## 23 **Rpd3L complex availability counterbalanced Rpd3S function**

1 Surprisingly, we found that *rpd3Δ* suppressed *spn1-K192N* less robustly than *rco1Δ*, and  
2 that this less robust suppression was in fact epistatic to *rco1Δ*, suggesting that loss of other Rpd3  
3 functions had detrimental effects on *spn1-K192N* (Figure 5A). The Rpd3L complex seemed like  
4 the best candidate for such a counterbalancing Rpd3 function. To assess the function of Rpd3L in  
5 our experiments, we utilized mutations in Rpd3L subunits that had varying effects on Rpd3L  
6 complex formation. Loss of the Pho23 subunit of Rpd3L is documented to have only minor  
7 consequences on complex integrity (CARROZZA *et al.* 2005a). *PHO23* deletion had no effect on  
8 *spn1-K192N* temperature sensitivity nor did it affect suppression of *spn1-K192N* by *jhd2Δ*  
9 (Figure 5B). In contrast to *PHO23*, we found that *dep1Δ*, which was previously shown to  
10 completely disrupt Rpd3L complex formation (CARROZZA *et al.* 2005a), enhanced the  
11 temperature sensitive growth defect of *spn1-K192N* (Figure 5C). Thus, Rpd3L appeared to  
12 somehow promote *SPN1* function in direct contrast to its Rpd3S counterpart.

13 The disruption of Rpd3L was previously shown to greatly increase the amount of Rco1  
14 protein in the cell (BISWAS *et al.* 2008). We hypothesized that *dep1Δ* enhanced the temperature  
15 sensitivity of *spn1-K192N* via increased Rco1 protein levels and resulting increased Rpd3S  
16 function. To test this, we introduced *rco1Δ* into the *spn1-K192N dep1Δ* double mutant.  
17 Suppression of *spn1-K192N* by *rco1Δ* was epistatic to the enhancement caused by *dep1Δ*  
18 suggesting that the *dep1Δ* enhancement phenotype was due to increased Rpd3S function (Figure  
19 5C). As our model posits that Jhd2 positively regulated Rpd3S through its demethylation of  
20 H3K4, *jhd2Δ* is predicted to therefore also alleviate the enhanced *spn1-K192N* growth defects  
21 caused by loss of Rpd3L. Consistent with this prediction, we found that *jhd2Δ* suppressed the  
22 growth defects of *spn1-K192N dep1Δ* mutants, but not to the same extent as *rco1Δ* did (Figure  
23 5D). This less robust suppression of *spn1-K192N* by *jhd2Δ* compared with by *rco1Δ* seems

1 sensible, as Rpd3S is presumably still present in *jhd2Δ* cells while it is completely absent in  
2 *rco1Δ* cells (CARROZZA *et al.* 2005a). As expected given the known role of Set2 in promoting  
3 Rpd3S chromatin recruitment, *set2Δ*, like *rco1Δ*, reverted the *spn1-K192N dep1Δ* growth  
4 defects. (Figure 5E).

## 5 **Discussion**

6 We previously found that increased H3K4me3 levels suppressed TS alleles of Spt6-Spn1  
7 while decreased H3K4me3 levels enhanced them (LEE *et al.* 2018). Here we show that  
8 perturbation of the Set2-H3K36me-Rpd3S pathway similarly suppresses TS alleles of Spt6-  
9 Spn1, revealing that Rpd3S function somehow opposes Spt6-Spn1 and permitting a series of  
10 genetic epistasis experiments investigating the contributions of H3K4me and H3K36me to  
11 Rpd3S functionality. Indeed, we provide genetic evidence consistent with the conclusion that  
12 H3K4me also modulates Rpd3S: *rco1Δ* and *rco1-PHDA* suppressed *spn1-K192N* equivalently to  
13 and non-additively with *jhd2Δ*. Critically, *rco1Δ* also suppressed the exacerbated *spn1-K192N*  
14 growth defects caused by reduced H3K4me. Our subsequent genetic interrogations of both *RPH1*  
15 and of Rpd3L further support the model we present in Figure 3C. Functional insights into H3K4  
16 and H3K36 demethylation in yeast remain relatively narrow compared with their corresponding  
17 methyltransferase enzymes, and our findings show that at least one role of Jhd2 and Rph1 is in  
18 fine-tuning H3K4me0/H3K36me3 activation of Rpd3S.

19 We attempted to use chromatin immunoprecipitation (ChIP) experiments with an epitope  
20 tagged allele of Rpd3 in mitotic cells to advance our model and were not able to attain  
21 reproducible Rpd3 chromatin association. Recent findings show that Rpd3 chromatin association  
22 is developmentally regulated and becomes much more robust and focused in haploid “Q” cells

1 that have depleted their growth media and entered quiescence (MCKNIGHT *et al.* 2015). Perhaps  
2 relatedly, Rpd3 has prominent roles in meiotic development during which cells similarly  
3 transition into transcriptional dormancy in response to nutrient starvation (XU *et al.* 2012;  
4 YEHESEKELY-HAYON *et al.* 2013; LARDENOIS *et al.* 2015). It seems plausible that the  
5 H3K4me0/H3K36me Rpd3S pathway we have identified using the sensitized Spt6-Spn1 TS  
6 allele background may have more relevant roles within these developmental contexts? It will be  
7 of interest to use more penetrating methods such as ChIP-Seq to advance our model in meiotic  
8 and/or Q cells.

9       By what molecular mechanisms might H3K4me (and H3K36me) impact Rpd3S  
10 function? Histone modifications are typically suggested to impact chromatin effector complex  
11 function through their purported roles in recruitment of these complexes to specific regions of  
12 chromatin where these modifications reside. While considerable evidence exists for this, in the  
13 case of Rpd3S, focused studies suggest that the histone binding activities of Eaf3 and Rco1 play  
14 little/no role in chromatin recruitment and, rather, impact Rpd3S activity on chromatin  
15 allosterically (DROUIN *et al.* 2010). Indeed, more recent findings illuminate a similar scenario in  
16 the function of the acetyltransferase complex NuA4, whose enzymatic action on chromatin is  
17 controlled through subunits with defined histone binding specificities that have no apparent role  
18 in chromatin recruitment of NuA4 (STEUNOU *et al.* 2016). It is thus attractive to speculate that  
19 H3K4me3 opposition of Rco1 histone binding prevents Rpd3S from deacetylating nucleosomes  
20 through allosteric inhibition of Rpd3S activity (as opposed to through Rpd3S chromatin  
21 association). Whether H3K4/36me regulation of Rpd3S acts through chromatin recruitment or  
22 allosteric modulation of Rpd3 activity (or both), our model predicts Rpd3S deacetylation should

1 be restricted near the 5' ends of transcription units by H3K4me3, where this modification is  
2 typically found.

3

#### 4 **References**

- 5 Bernstein, B. E., J. K. Tong and S. L. Schreiber, 2000 Genomewide studies of histone  
6 deacetylase function in yeast. *Proc Natl Acad Sci U S A* 97: 13708-13713.
- 7 Biswas, D., R. Dutta-Biswas, D. Mitra, Y. Shibata, B. D. Strahl *et al.*, 2006 Opposing roles for  
8 Set2 and yFACT in regulating TBP binding at promoters. *EMBO J* 25: 4479-4489.
- 9 Biswas, D., S. Takahata and D. J. Stillman, 2008 Different genetic functions for the Rpd3(L) and  
10 Rpd3(S) complexes suggest competition between NuA4 and Rpd3(S). *Mol Cell Biol* 28:  
11 4445-4458.
- 12 Carrozza, M. J., L. Florens, S. K. Swanson, W. J. Shia, S. Anderson *et al.*, 2005a Stable  
13 incorporation of sequence specific repressors Ash1 and Ume6 into the Rpd3L complex.  
14 *Biochim Biophys Acta* 1731: 77-87; discussion 75-76.
- 15 Carrozza, M. J., B. Li, L. Florens, T. Suganuma, S. K. Swanson *et al.*, 2005b Histone H3  
16 methylation by Set2 directs deacetylation of coding regions by Rpd3S to suppress  
17 spurious intragenic transcription. *Cell* 123: 581-592.
- 18 Dai, J., E. M. Hyland, D. S. Yuan, H. Huang, J. S. Bader *et al.*, 2008 Probing nucleosome  
19 function: a highly versatile library of synthetic histone H3 and H4 mutants. *Cell* 134:  
20 1066-1078.
- 21 Doyon, Y., and J. Cote, 2004 The highly conserved and multifunctional NuA4 HAT complex.  
22 *Curr Opin Genet Dev* 14: 147-154.
- 23 Drouin, S., L. Laramee, P. E. Jacques, A. Forest, M. Bergeron *et al.*, 2010 DSIF and RNA  
24 polymerase II CTD phosphorylation coordinate the recruitment of Rpd3S to actively  
25 transcribed genes. *PLoS Genet* 6: e1001173.
- 26 Fang, J., G. J. Hogan, G. Liang, J. D. Lieb and Y. Zhang, 2007 The *Saccharomyces cerevisiae*  
27 histone demethylase Jhd1 fine-tunes the distribution of H3K36me2. *Molecular and*  
28 *cellular biology* 27: 5055-5065.
- 29 Giaever, G., A. M. Chu, L. Ni, C. Connelly, L. Riles *et al.*, 2002 Functional profiling of the  
30 *Saccharomyces cerevisiae* genome. *Nature* 418: 387-391.
- 31 Ingvarsdottir, K., C. Edwards, M. G. Lee, J. S. Lee, D. C. Schultz *et al.*, 2007 Histone H3 K4  
32 demethylation during activation and attenuation of GAL1 transcription in *Saccharomyces*  
33 *cerevisiae*. *Molecular and cellular biology* 27: 7856-7864.
- 34 Joshi, A. A., and K. Struhl, 2005 Eaf3 chromodomain interaction with methylated H3-K36 links  
35 histone deacetylation to Pol II elongation. *Mol Cell* 20: 971-978.
- 36 Keogh, M. C., S. K. Kurdistani, S. A. Morris, S. H. Ahn, V. Podolny *et al.*, 2005  
37 Cotranscriptional set2 methylation of histone H3 lysine 36 recruits a repressive Rpd3  
38 complex. *Cell* 123: 593-605.
- 39 Kim, T., and S. Buratowski, 2007 Two *Saccharomyces cerevisiae* JmjC domain proteins  
40 demethylate histone H3 Lys36 in transcribed regions to promote elongation. *J Biol Chem*  
41 282: 20827-20835.

- 1 Klose, R. J., K. E. Gardner, G. Liang, H. Erdjument-Bromage, P. Tempst *et al.*, 2007  
2 Demethylation of histone H3K36 and H3K9 by Rph1: a vestige of an H3K9 methylation  
3 system in *Saccharomyces cerevisiae*? *Molecular and cellular biology* 27: 3951-3961.
- 4 Kurdistani, S. K., D. Robyr, S. Tavazoie and M. Grunstein, 2002 Genome-wide binding map of  
5 the histone deacetylase Rpd3 in yeast. *Nat Genet* 31: 248-254.
- 6 Lardenois, A., I. Stuparevic, Y. Liu, M. J. Law, E. Becker *et al.*, 2015 The conserved histone  
7 deacetylase Rpd3 and its DNA binding subunit Ume6 control dynamic transcript  
8 architecture during mitotic growth and meiotic development. *Nucleic Acids Res* 43: 115-  
9 128.
- 10 Lee, C. H., J. Wu and B. Li, 2013 Chromatin remodelers fine-tune H3K36me-directed  
11 deacetylation of neighbor nucleosomes by Rpd3S. *Mol Cell* 52: 255-263.
- 12 Lee, K. Y., Z. Chen, R. Jiang and M. D. Meneghini, 2018 H3K4 Methylation Dependent and  
13 Independent Chromatin Regulation by JHD2 and SET1 in Budding Yeast. *G3 (Bethesda)*  
14 8: 1829-1839.
- 15 Lee, W., D. Tillo, N. Bray, R. H. Morse, R. W. Davis *et al.*, 2007 A high-resolution atlas of  
16 nucleosome occupancy in yeast. *Nature genetics* 39: 1235-1244.
- 17 Li, B., M. Gogol, M. Carey, D. Lee, C. Seidel *et al.*, 2007 Combined action of PHD and chromo  
18 domains directs the Rpd3S HDAC to transcribed chromatin. *Science* 316: 1050-1054.
- 19 Liang, G., R. J. Klose, K. E. Gardner and Y. Zhang, 2007 Yeast Jhd2p is a histone H3 Lys4  
20 trimethyl demethylase. *Nature structural & molecular biology* 14: 243-245.
- 21 Longtine, M. S., A. McKenzie, 3rd, D. J. Demarini, N. G. Shah, A. Wach *et al.*, 1998 Additional  
22 modules for versatile and economical PCR-based gene deletion and modification in  
23 *Saccharomyces cerevisiae*. *Yeast* 14: 953-961.
- 24 McDaniel, S. L., J. E. Fligor, C. Ruan, H. Cui, J. B. Bridgers *et al.*, 2016 Combinatorial Histone  
25 Readout by the Dual Plant Homeodomain (PHD) Fingers of Rco1 Mediates Rpd3S  
26 Chromatin Recruitment and the Maintenance of Transcriptional Fidelity. *J Biol Chem*  
27 291: 14796-14802.
- 28 McKnight, J. N., J. W. Boerma, L. L. Breeden and T. Tsukiyama, 2015 Global Promoter  
29 Targeting of a Conserved Lysine Deacetylase for Transcriptional Shutoff during  
30 Quiescence Entry. *Mol Cell* 59: 732-743.
- 31 Musselman, C. A., M. E. Lalonde, J. Cote and T. G. Kutateladze, 2012 Perceiving the epigenetic  
32 landscape through histone readers. *Nat Struct Mol Biol* 19: 1218-1227.
- 33 Quan, T. K., and G. A. Hartzog, 2010 Histone H3K4 and K36 methylation, Chd1 and Rpd3S  
34 oppose the functions of *Saccharomyces cerevisiae* Spt4-Spt5 in transcription. *Genetics*  
35 184: 321-334.
- 36 Rando, O. J., 2012 Combinatorial complexity in chromatin structure and function: revisiting the  
37 histone code. *Current opinion in genetics & development* 22: 148-155.
- 38 Rossetto, D., M. Cramet, A. Y. Wang, A. L. Steunou, N. Lacoste *et al.*, 2014 Eaf5/7/3 form a  
39 functionally independent NuA4 submodule linked to RNA polymerase II-coupled  
40 nucleosome recycling. *EMBO J* 33: 1397-1415.
- 41 Ruan, C., C. H. Lee, H. Cui, S. Li and B. Li, 2015 Nucleosome contact triggers conformational  
42 changes of Rpd3S driving high-affinity H3K36me nucleosome engagement. *Cell Rep* 10:  
43 204-215.
- 44 Rundlett, S. E., A. A. Carmen, R. Kobayashi, S. Bavykin, B. M. Turner *et al.*, 1996 HDA1 and  
45 RPD3 are members of distinct yeast histone deacetylase complexes that regulate  
46 silencing and transcription. *Proc Natl Acad Sci U S A* 93: 14503-14508.



- 1 Soloveychik, M., M. Xu, O. Zaslaver, K. Lee, A. Narula *et al.*, 2016 Mitochondrial control  
2 through nutritionally regulated global histone H3 lysine-4 demethylation. *Sci Rep* 6:  
3 37942.
- 4 Steunou, A. L., M. Cramet, D. Rossetto, M. J. Aristizabal, N. Lacoste *et al.*, 2016 Combined  
5 Action of Histone Reader Modules Regulates NuA4 Local Acetyltransferase Function but  
6 Not Its Recruitment on the Genome. *Mol Cell Biol* 36: 2768-2781.
- 7 Storici, F., and M. A. Resnick, 2003 Delitto perfetto targeted mutagenesis in yeast with  
8 oligonucleotides. *Genetic engineering* 25: 189-207.
- 9 Strahl, B. D., and C. D. Allis, 2000 The language of covalent histone modifications. *Nature* 403:  
10 41-45.
- 11 Tsukada, Y., J. Fang, H. Erdjument-Bromage, M. E. Warren, C. H. Borchers *et al.*, 2006 Histone  
12 demethylation by a family of JmjC domain-containing proteins. *Nature* 439: 811-816.
- 13 Wang, S. S., B. O. Zhou and J. Q. Zhou, 2011 Histone H3 lysine 4 hypermethylation prevents  
14 aberrant nucleosome remodeling at the PHO5 promoter. *Mol Cell Biol* 31: 3171-3181.
- 15 Xu, C., G. Cui, M. V. Botuyan and G. Mer, 2008 Structural basis for the recognition of  
16 methylated histone H3K36 by the Eaf3 subunit of histone deacetylase complex Rpd3S.  
17 *Structure* 16: 1740-1750.
- 18 Xu, M., M. Soloveychik, M. Rangan, M. Schertzberg, Z. Shah *et al.*, 2012 Timing of  
19 transcriptional quiescence during gametogenesis is controlled by global histone H3K4  
20 demethylation. *Dev Cell* 23: 1059-1071.
- 21 Yeheskely-Hayon, D., A. Kotler, M. Stark, T. Hashimshony, S. Sagee *et al.*, 2013 The roles of  
22 the catalytic and noncatalytic activities of Rpd3L and Rpd3S in the regulation of gene  
23 transcription in yeast. *PLoS One* 8: e85088.
- 24 Yun, M., J. Wu, J. L. Workman and B. Li, 2011 Readers of histone modifications. *Cell Res* 21:  
25 564-578.

26  
27 **Acknowledgements**

28 This work was supported by CIHR grant MOP-89996 to M.D.M. We are grateful to Dr. Charlie  
29 Boone and Dr. Brenda Andrews for access to their temperature-sensitive mutant library and other  
30 reagents, and to Ziyang Chen for construction of Figure 3C. The *Rco1-TAP::HIS3MX6* and *Rco1-*  
31 *ΔPhD-TAP:HIS3MX6* strains were kindly provided by Dr. Jerry Workman.

32  
33 **Figure Legends**

34  
35 **Figure 1. Set2 antagonizes Spt6-Spn1 through H3K36me.**

1 Yeast strains with the indicated genotypes were serially diluted ten-fold, spotted onto agar plates  
2 containing synthetic complete media, and grown at indicated temperatures. Genetic interactions  
3 of *jhd2Δ* and *set2Δ* with the temperature sensitive alleles (A) *spt6-14* and (B) *spn1-K192N* are  
4 shown. (C) Strains were constructed through genetic crosses with H3K36R substitution mutants  
5 from the Dharmacon Non Essential Histone H3 & H4 Mutant Collection. Genetic interactions of  
6 *set2Δ* and H3K36R with *spn1-K192N* are shown.

7

8 **Figure 2. Suppression of Spt6-Spn1 mutants by *set2Δ* is epistatic to their enhancement**  
9 **caused by *JHD2* overexpression.**

10 *P<sub>GAL</sub>-JHD2* is a construct that replaces the endogenous *JHD2* locus. Cells grown in galactose  
11 overexpress *JHD2* and cells grown without galactose do not express *JHD2*. (A) Western blot  
12 detection of H3K4me3, H3K4me2, H3K4me1, and pan-H3 are shown for extracts prepared from  
13 wild- type, *P<sub>GAL</sub>-JHD2*, and *P<sub>GAL</sub>-JHD2(H427A)* cells grown in synthetic complete media  
14 containing 2% galactose. Pan-H3 serves as a loading control. (B, C, and D) Plate spot assays (as  
15 described in Figure 1) were used to compare the growth of the indicated strains on synthetic  
16 media with 2% dextrose (DEX, B) or 2% galactose (GAL, C and D). (E) Genetic interactions of  
17 *set1Δ* and *set2Δ* with *spn1-K192N* are shown.

18

19 **Figure 3. *SPN1* mutants were suppressed by loss of *Rpd3S*.**

20 Plate spot assays (as described in Figure 1) were used to compare the growth of the indicated  
21 strains on synthetic media with 2% dextrose (DEX) or 2% galactose (GAL). (A) Genetic  
22 interactions of *jhd2Δ* and *rpd3Δ* with *spn1-K192N*. (B) Genetic interactions of *jhd2Δ* and *rco1Δ*  
23 with *spn1-K192N*. *P<sub>GAL</sub>-JHD2* (as described in Figure 2) is used in the following experiments.

1 (C) Genetic model of Rpd3S regulation by the H3K4me and H3K36me through the methyl-  
2 binding specificities of the Rpd3S subunits Rco1 and Eaf3. The heavier arrow indicates that  
3 H3K36me has a more crucial role in the regulation of Rpd3S than that of H3K4me0. (D) Genetic  
4 interactions of *rco1Δ* and *P<sub>GAL</sub>-JHD2* with *spn1-K192N* on GAL. (E) Genetic interactions of  
5 *eaf3Δ* and *P<sub>GAL</sub>-JHD2* with *spn1-K192N* on GAL.

6

#### 7 **Figure 4. H3K4 and H3K36 methylation states collaboratively modulated Rpd3S.**

8 Plate spot assays (as described in Figure 1) were used to compare the growth of the indicated  
9 strains. *rco1-PHDA* is an allele of *RCO1* that lacks the N-terminal PHD domain but encodes a  
10 stable protein that is assembled into Rpd3S *in vivo*. (A) Genetic interactions of *jhd2Δ* and *rco1-*  
11 *PHDA* with *spn1-K192N*. Growth of two independent isolates of each genotype is shown. (B)  
12 Genetic interactions of *rco1Δ* and H3K4R with *spn1-K192N*. Growth of two independent isolates  
13 of each genotype is shown. (C) Genetic interactions of *rph1Δ* and *set2Δ* with *spn1-K192N*. (D)  
14 Genetic interactions of *jhd2Δ* and *rph1Δ* with *spn1-K192N*.

15

#### 16 **Figure 5. Rpd3L complex availability counterbalanced Rpd3S function.**

17 Plate spot assays (as described in Figure 1) were used to compare the growth of the indicated  
18 strains. (A) Genetic interactions of *rco1Δ* and *rpd3Δ* with *spn1-K192N*. (B) Genetic interactions  
19 of *jhd2Δ* and *pho23Δ* with *spn1-K192N*. (C) Genetic interactions of *dep1Δ* and *rco1Δ*, with *spn1-*  
20 *K192N*. (D) Genetic interactions of *dep1Δ* and *jhd2Δ* with *spn1-K192N*. (E) Genetic interactions  
21 of *dep1Δ* and *set2Δ* with *spn1-K192N*. Growth of two independent isolates of each genotype is  
22 shown.

23

1 **Supp. Figure 1. The enhancement of *spn1-K192N* by *JHD2* overexpression is reverted by a**  
2 **catalytically inactive histidine-427 to alanine mutation in *Jhd2*.**

3 Plate spot assays (as described in Figure 1) were used to compare the growth of the indicated  
4 strains on synthetic media with 2% dextrose (DEX) or 2% galactose (GAL). *P<sub>GAL</sub>-JHD2* is used  
5 to replace the endogenous *JHD2* locus so that cells grown in galactose overexpress *JHD2* and  
6 cells grown without galactose do not express *JHD2*. A H427A mutation was introduced into  
7 *P<sub>GAL</sub>-JHD2* which disrupts its histone demethylase activity. (A) Genetic interactions of *set2Δ* and  
8 *P<sub>GAL</sub>-JHD2(H427A)* with *spn1-K192N* on GAL. (B) Genetic interactions of *set2Δ* and *P<sub>GAL</sub>-*  
9 *JHD2(H427A)* with *spn1-K192N* on DEX.

10

11 **Supp. Figure 2. The suppression by *eaf3Δ* is not due to loss of the NuA4 histone**  
12 **acetyltransferase complex.**

13 Plate spot assays (as described in Figure 1) were used to compare the growth of the indicated  
14 strains. Genetic interactions of *eaf7Δ* and *jhd2Δ* with *spn1-K192N*.

15

16 **Supp. Figure 3. The enhancement of *spn1-K192N* temperature sensitivity by *rph1Δ* is**  
17 **reverted by *rco1Δ*.**

18 Plate spot assays (as described in Figure 1) were used to compare the growth of the indicated  
19 strains. Genetic interactions of *rco1Δ* and *rph1Δ* with *spn1-K192N*.

20

21

Figure 1

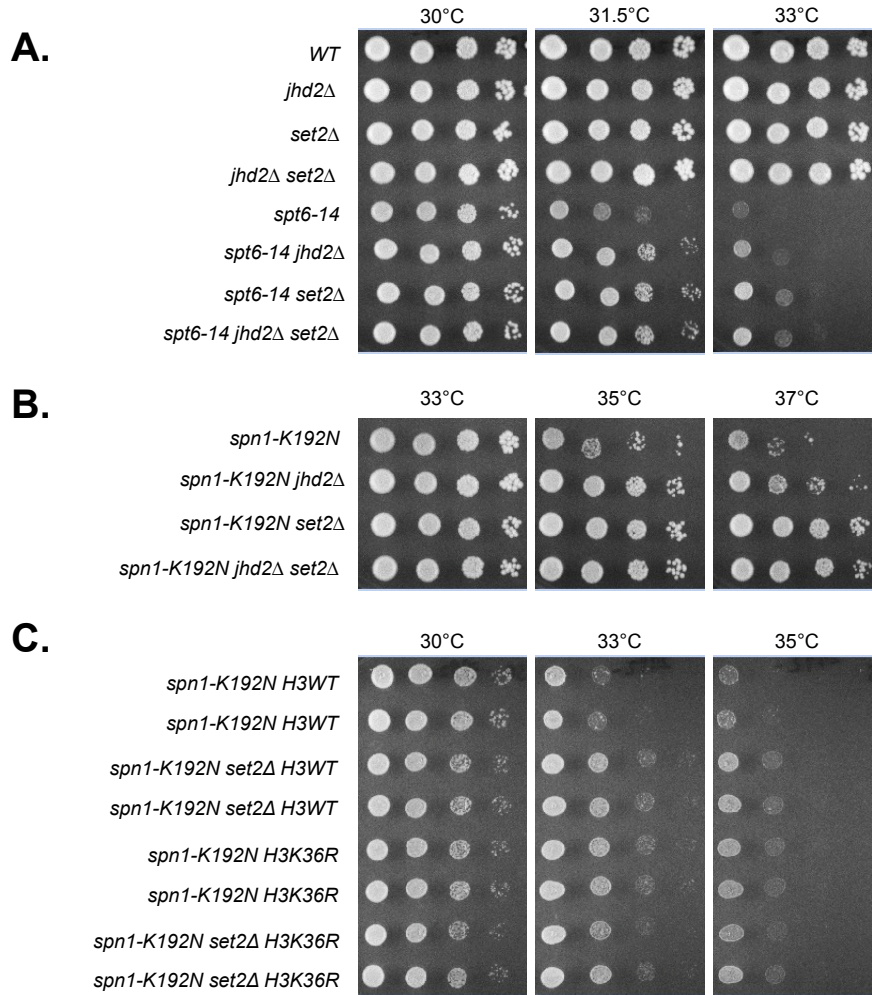

## Figure 2

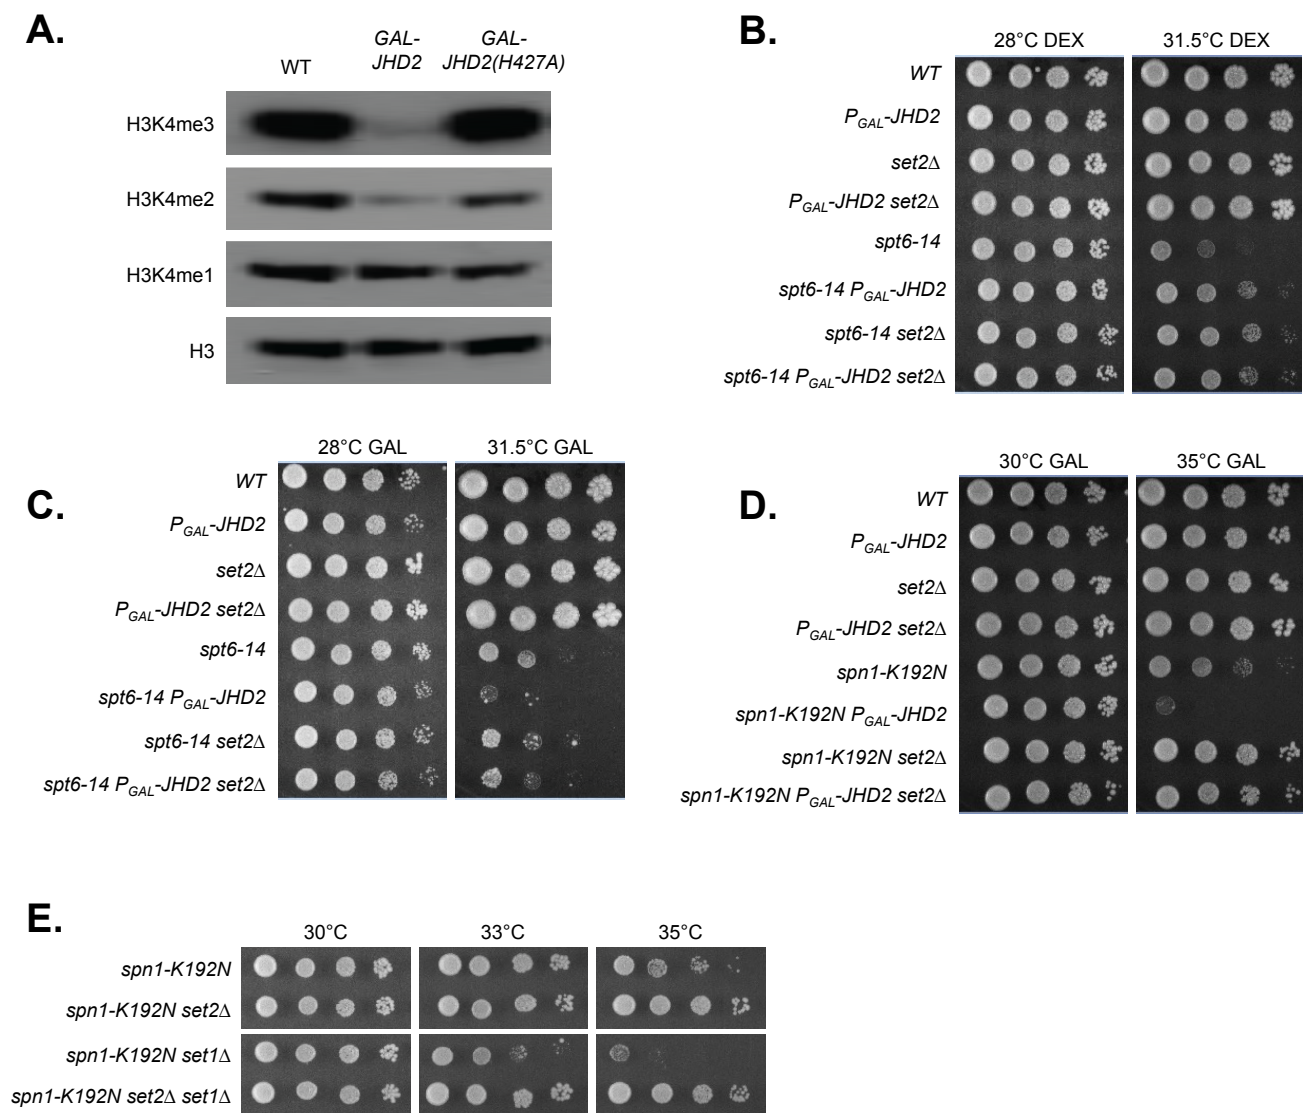

## Figure 3

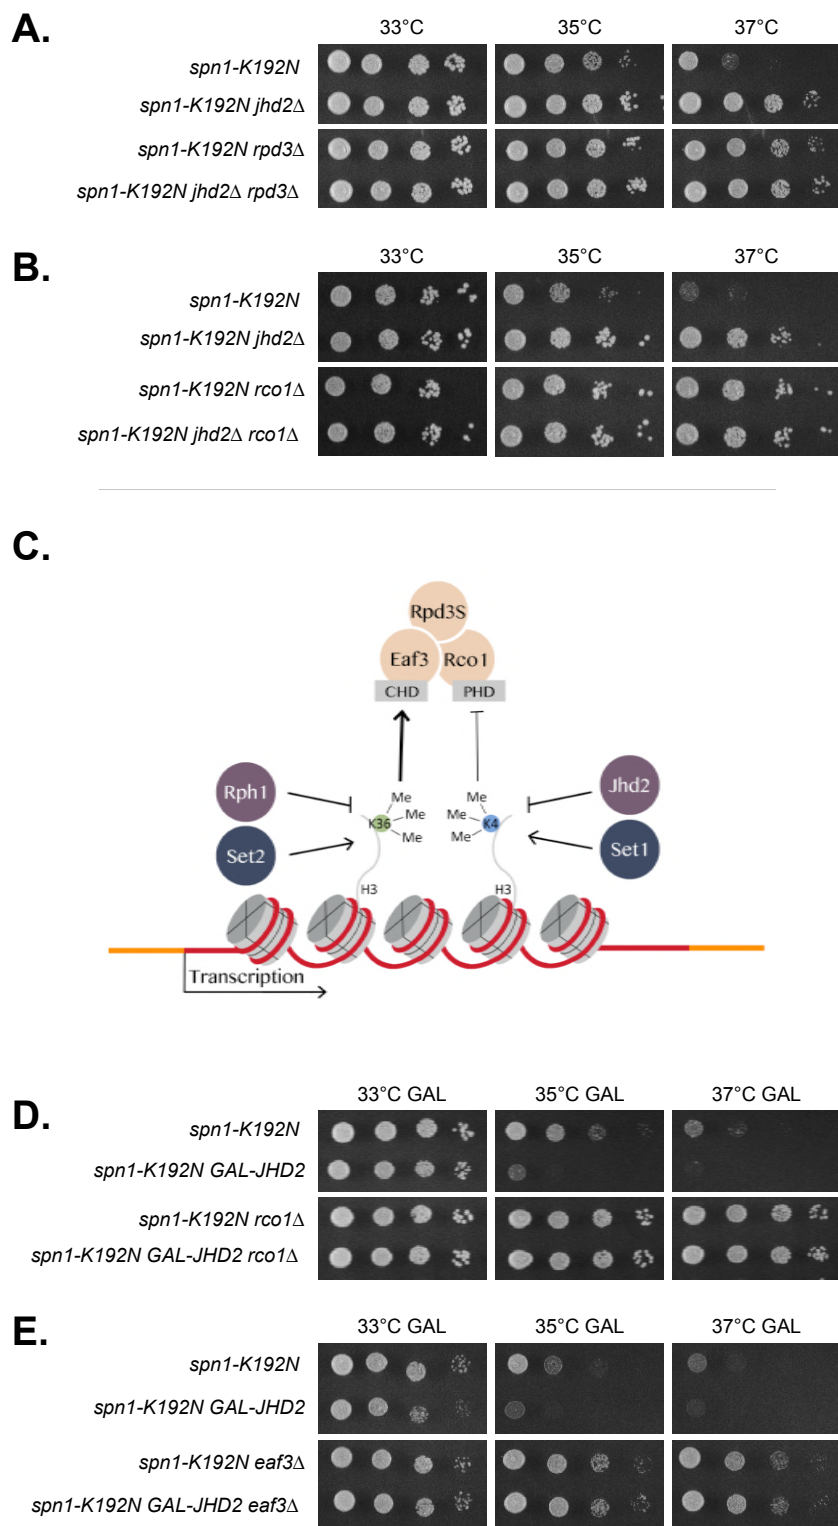

## Figure 4

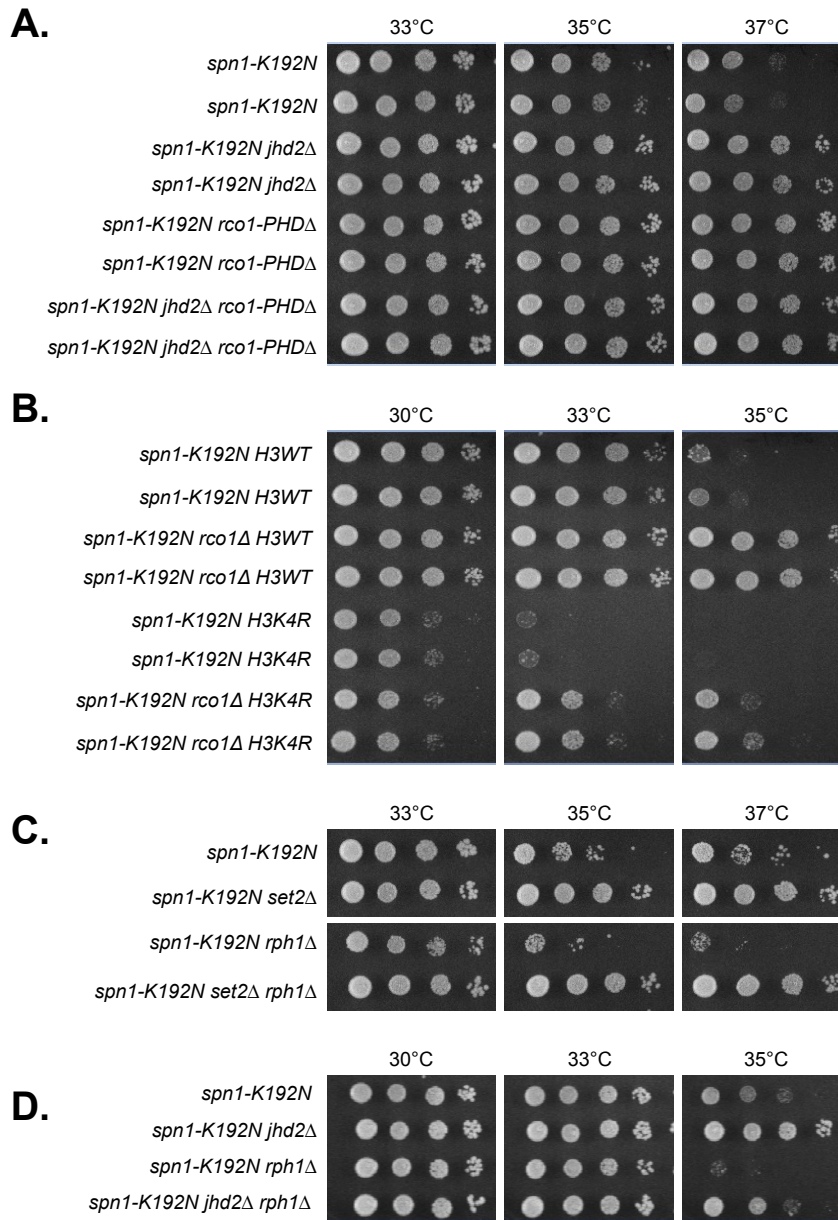



Figure 5

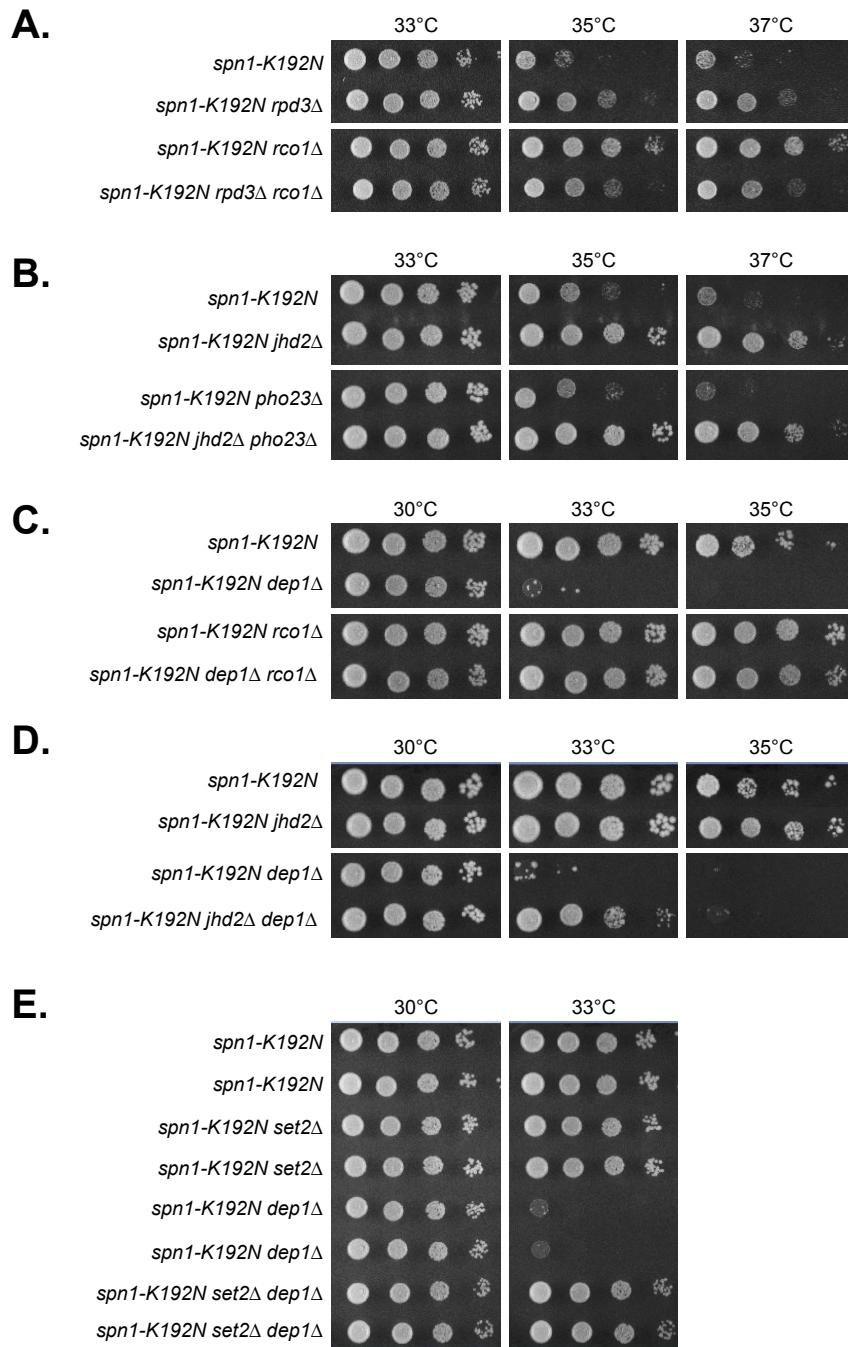

## Figure S1

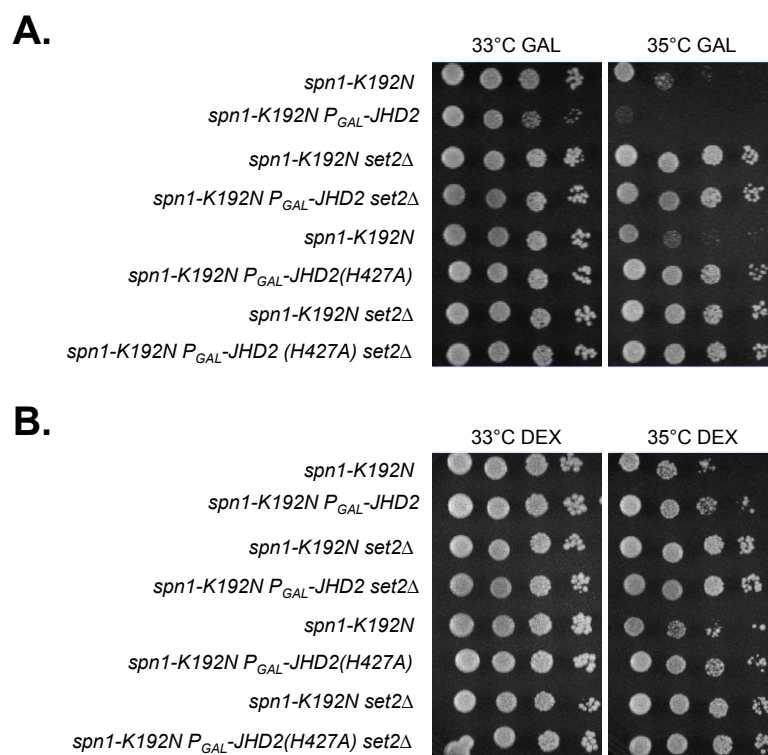

## Figure S2

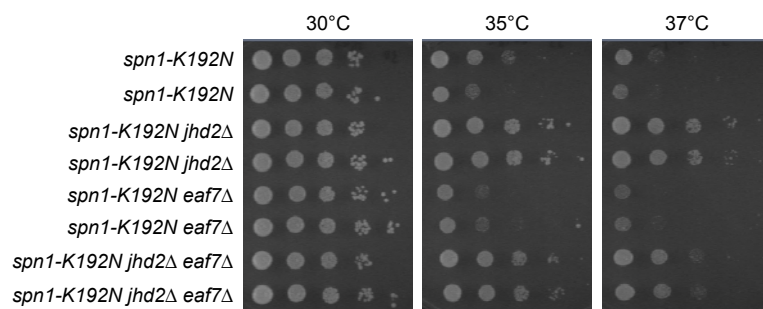

## Figure S3

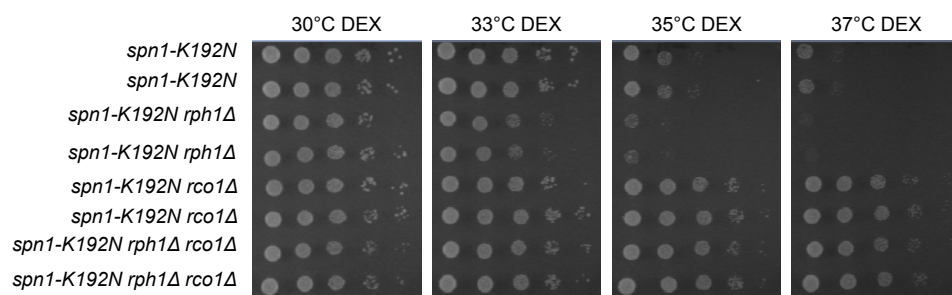

Source: https://www.biorxiv.org/content/10.1101/376046v1.full.pdf
